# Supplementary material for: Support for Local Tobacco Policy in a Preemptive State
Source: MDPI journal article supplement (doi:10.3390/ijerph16183378), 2019-09-12
Supplement: s1 [file s1]

Table S1. Descriptive statistics of study variables

| Variables                        | Overall |                       |
|----------------------------------|---------|-----------------------|
|                                  | n       | Weighted %<br>(95%CI) |
| <b>Gender</b>                    |         |                       |
| Male                             | 1980    | 49.34 (47.35, 51.32)  |
| Female                           | 2481    | 50.66 (48.68, 52.65)  |
| <b>Age</b>                       |         |                       |
| 18-34                            | 1334    | 37.33 (35.36, 39.30)  |
| 35-54                            | 1763    | 40.46 (38.51, 42.41)  |
| 55 or older                      | 1364    | 22.21 (20.70, 23.71)  |
| <b>Race/Ethnicity</b>            |         |                       |
| White                            | 3113    | 67.96 (66.08, 69.85)  |
| Black or African-American        | 242     | 7.29 (6.18, 8.41)     |
| American Indian or Alaska Native | 441     | 6.81 (5.95, 7.67)     |
| Hispanic                         | 265     | 9.44 (8.14, 10.75)    |
| Multiracial                      | 313     | 5.98 (5.05, 6.90)     |
| Other                            | 87      | 2.51 (1.87, 3.15)     |
| <b>Education</b>                 |         |                       |
| High school or less              | 1409    | 43.23 (41.21, 45.25)  |
| Some college or more             | 3052    | 56.77 (54.75, 58.79)  |
| <b>Income</b>                    |         |                       |
| ≤ \$30,000                       | 1042    | 21.58 (19.97, 23.19)  |
| \$30,000 – <\$45,000             | 664     | 14.16 (12.75, 15.58)  |
| \$45,000 – <\$60,000             | 673     | 13.29 (11.99, 14.59)  |
| \$60,000 – <\$80,000             | 640     | 15.52 (14.04, 16.99)  |
| \$80,000 – <\$100,000            | 552     | 10.95 (9.76, 12.13)   |
| \$100,000 – <\$150,000           | 510     | 14.51 (13.05, 15.98)  |
| ≥ \$150,000                      | 380     | 9.97 (8.79, 11.18)    |

| Variables                                                                               | Overall |                       |
|-----------------------------------------------------------------------------------------|---------|-----------------------|
|                                                                                         | n       | Weighted %<br>(95%CI) |
| <b>Region</b>                                                                           |         |                       |
| Northwest                                                                               | 684     | 10.11 (9.33, 10.90)   |
| Northeast                                                                               | 946     | 20.96 (19.67, 22.25)  |
| Tulsa                                                                                   | 600     | 17.36 (16.07, 18.65)  |
| Central                                                                                 | 764     | 28.55 (26.91, 30.20)  |
| Southwest                                                                               | 716     | 11.13 (10.21, 12.04)  |
| Southeast                                                                               | 751     | 11.89 (11.01, 12.76)  |
| <b>Urban/Rural</b>                                                                      |         |                       |
| Urban                                                                                   | 1364    | 45.91 (44.22, 47.61)  |
| Rural                                                                                   | 3097    | 54.09 (52.39, 55.78)  |
| <b>Marital status</b>                                                                   |         |                       |
| Married                                                                                 | 2677    | 52.77 (50.77, 54.76)  |
| Widowed                                                                                 | 127     | 2.67 (2.03, 3.31)     |
| Divorced or separated                                                                   | 592     | 16.98 (15.40, 18.56)  |
| Never married and other                                                                 | 1065    | 27.58 (25.74, 29.42)  |
| <b>Cigarette smoking status</b>                                                         |         |                       |
| Current smoker                                                                          | 805     | 18.32 (16.79, 19.86)  |
| Former smoker                                                                           | 1027    | 21.31 (19.72, 22.91)  |
| Never smoker                                                                            | 2610    | 60.36 (58.42, 62.30)  |
| <b>How many of the people that are important to you use tobacco</b>                     |         |                       |
| None                                                                                    | 1171    | 24.84 (23.16, 26.52)  |
| Any                                                                                     | 3279    | 75.16 (73.48, 76.84)  |
| <b>How serious of a problem is smoking and tobacco use for people in your community</b> |         |                       |
| Not a serious, only a little serious, or fairly serious                                 | 2005    | 45.93 (43.91, 47.95)  |

| Variables                                                                                               | Overall |                       |
|---------------------------------------------------------------------------------------------------------|---------|-----------------------|
|                                                                                                         | n       | Weighted %<br>(95%CI) |
| Very serious                                                                                            | 2314    | 54.07 (52.05, 56.09)  |
| Awareness of any programs, activities, services, or policies to decrease tobacco use or exposure to SHS |         |                       |
| Yes                                                                                                     | 2296    | 49.00 (47.01, 50.99)  |
| No/Don't know                                                                                           | 2163    | 51.00 (49.01, 52.99)  |
| Knowledge of health effects of SHS                                                                      |         |                       |
| 0                                                                                                       | 386     | 8.94 (7.79, 10.09)    |
| 1                                                                                                       | 610     | 14.56 (13.10, 16.01)  |
| 2                                                                                                       | 1260    | 28.19 (26.39, 29.99)  |
| 3                                                                                                       | 1262    | 28.30 (26.50, 30.11)  |
| 4                                                                                                       | 882     | 20.01 (18.41, 21.60)  |
| Knowledge of health effects of SHS ( <i>mean, 95%CI</i> )                                               |         | 2.36 (2.31, 2.41)     |
